# Supplementary material for: Assessment of lidar depolarization uncertainty by means of a polarimetric lidar simulator
Source: Copernicus journal article supplement (doi:10.5194/amt-2015-339), 2016-02-08
Supplement: Supplementary file 1 [file amt-2015-339-supplement.pdf]

# Supplement to “Assessment of lidar depolarization uncertainty by means of a polarimetric lidar simulator”

Bravo-Aranda, J.A.1,2,3, Belegante L.4, Freudenthaler V.5, Alados-Arboledas A.1,2, Nicolae D.4, Granados-Muñoz M. J.1,2, Guerrero-Rascado, J. L.1,2, Amodeo A.6, D’Amico G.6, Engelmann R.7, Pappalardo G.6, Kokkalis P.8, Mamouri R.9, Papayannis A.8, Navas-Guzmán F.1,2,\*, Olmo, F. J.1,2, Wandinger U.7 and Haeffelin, M. 3

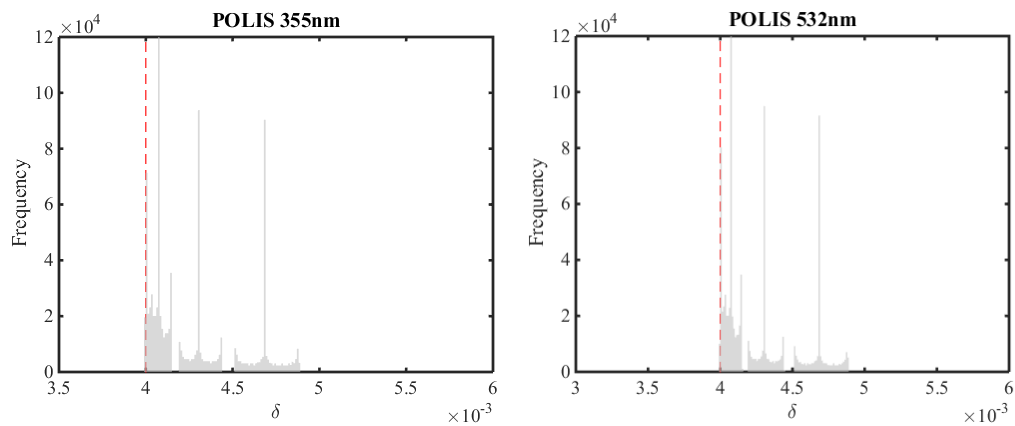

Figure S1: POLIS  $\delta$  histogram (at 355 and 532 nm) showed in Figure 9 with adapted axis scale. Dashed lines represent the real  $\delta$ ,  $\delta_r$ , at 0.004.

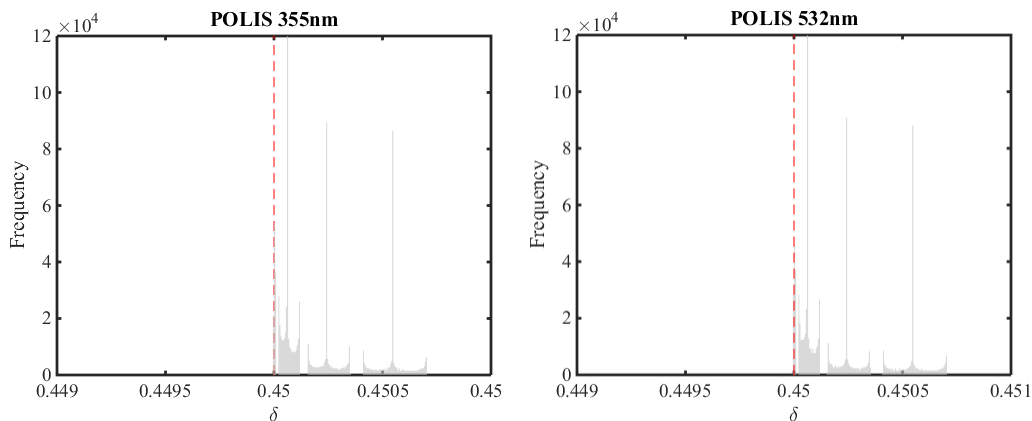

Figure S2: POLIS  $\delta$  histogram (at 355 and 532 nm) showed in Figure 9 with adapted axis scale. Dashed lines represent the real  $\delta$ ,  $\delta_r$ , at 0.45.
